# Supplementary material for: Correction: Single nucleus sequencing reveals evidence of inter-nucleus recombination in arbuscular mycorrhizal fungi
Source: eLife. 2019 Mar 21;8:e46860. doi: 10.7554/eLife.46860 (PMC6428567; doi:10.7554/eLife.46860)
Supplement: Supplementary file 4. [file elife-46860-supp4.xlsx]

## Sheet: Sheet1
Single nucleus sequencing reveals evidence of inter-nucleus recombination in arbuscular mycorrhizal fungi. Eric C.H. Chen, Stephanie Mathieu, Anne Hoffrichter, Kinga Sedzielewska-Toro, Max Peart, Adrian Pelin, Steve Ndikumana, Jeanne Ropars, Steven Dreissig, Jörg Fuchs, Andreas Brachmann, and Nicolas Corradi
Single nucleus sequencing reveals evidence of inter-nucleus recombination in arbuscular mycorrhizal fungi. Eric C.H. Chen, Stephanie Mathieu, Anne Hoffrichter, Kinga Sedzielewska-Toro, Max Peart, Adrian Pelin, Steve Ndikumana, Jeanne Ropars, Steven Dreissig, Jörg Fuchs, Andreas Brachmann, and Nicolas Corradi
Supplemental file 5. Number of SNP positions with strict filtering and strict filtering but without the 50/50 allele frequency criteria on the first 100 scaffolds.
	Number of SNPs in the first 100 scaffolds
	Strict filtering	No5050
R. irregularis A1	48	135
R. irregularis A4	2363	2493
R. irregularis A5	2483	3524
R. irregularis C2	57	222
R. irregularis SL1	971	1054
R. diaphanus	9	28
R. cerebriforme	131	277
